# Supplementary material for: Impact of low-frequency coding variants on human facial shape
Source: bioRxiv or medRxiv preprint supplement (doi:10.1101/2020.07.30.227769), 2020-09-05

Fig S1. Q-Q plot of gene-based MultiSKAT tests by facial module

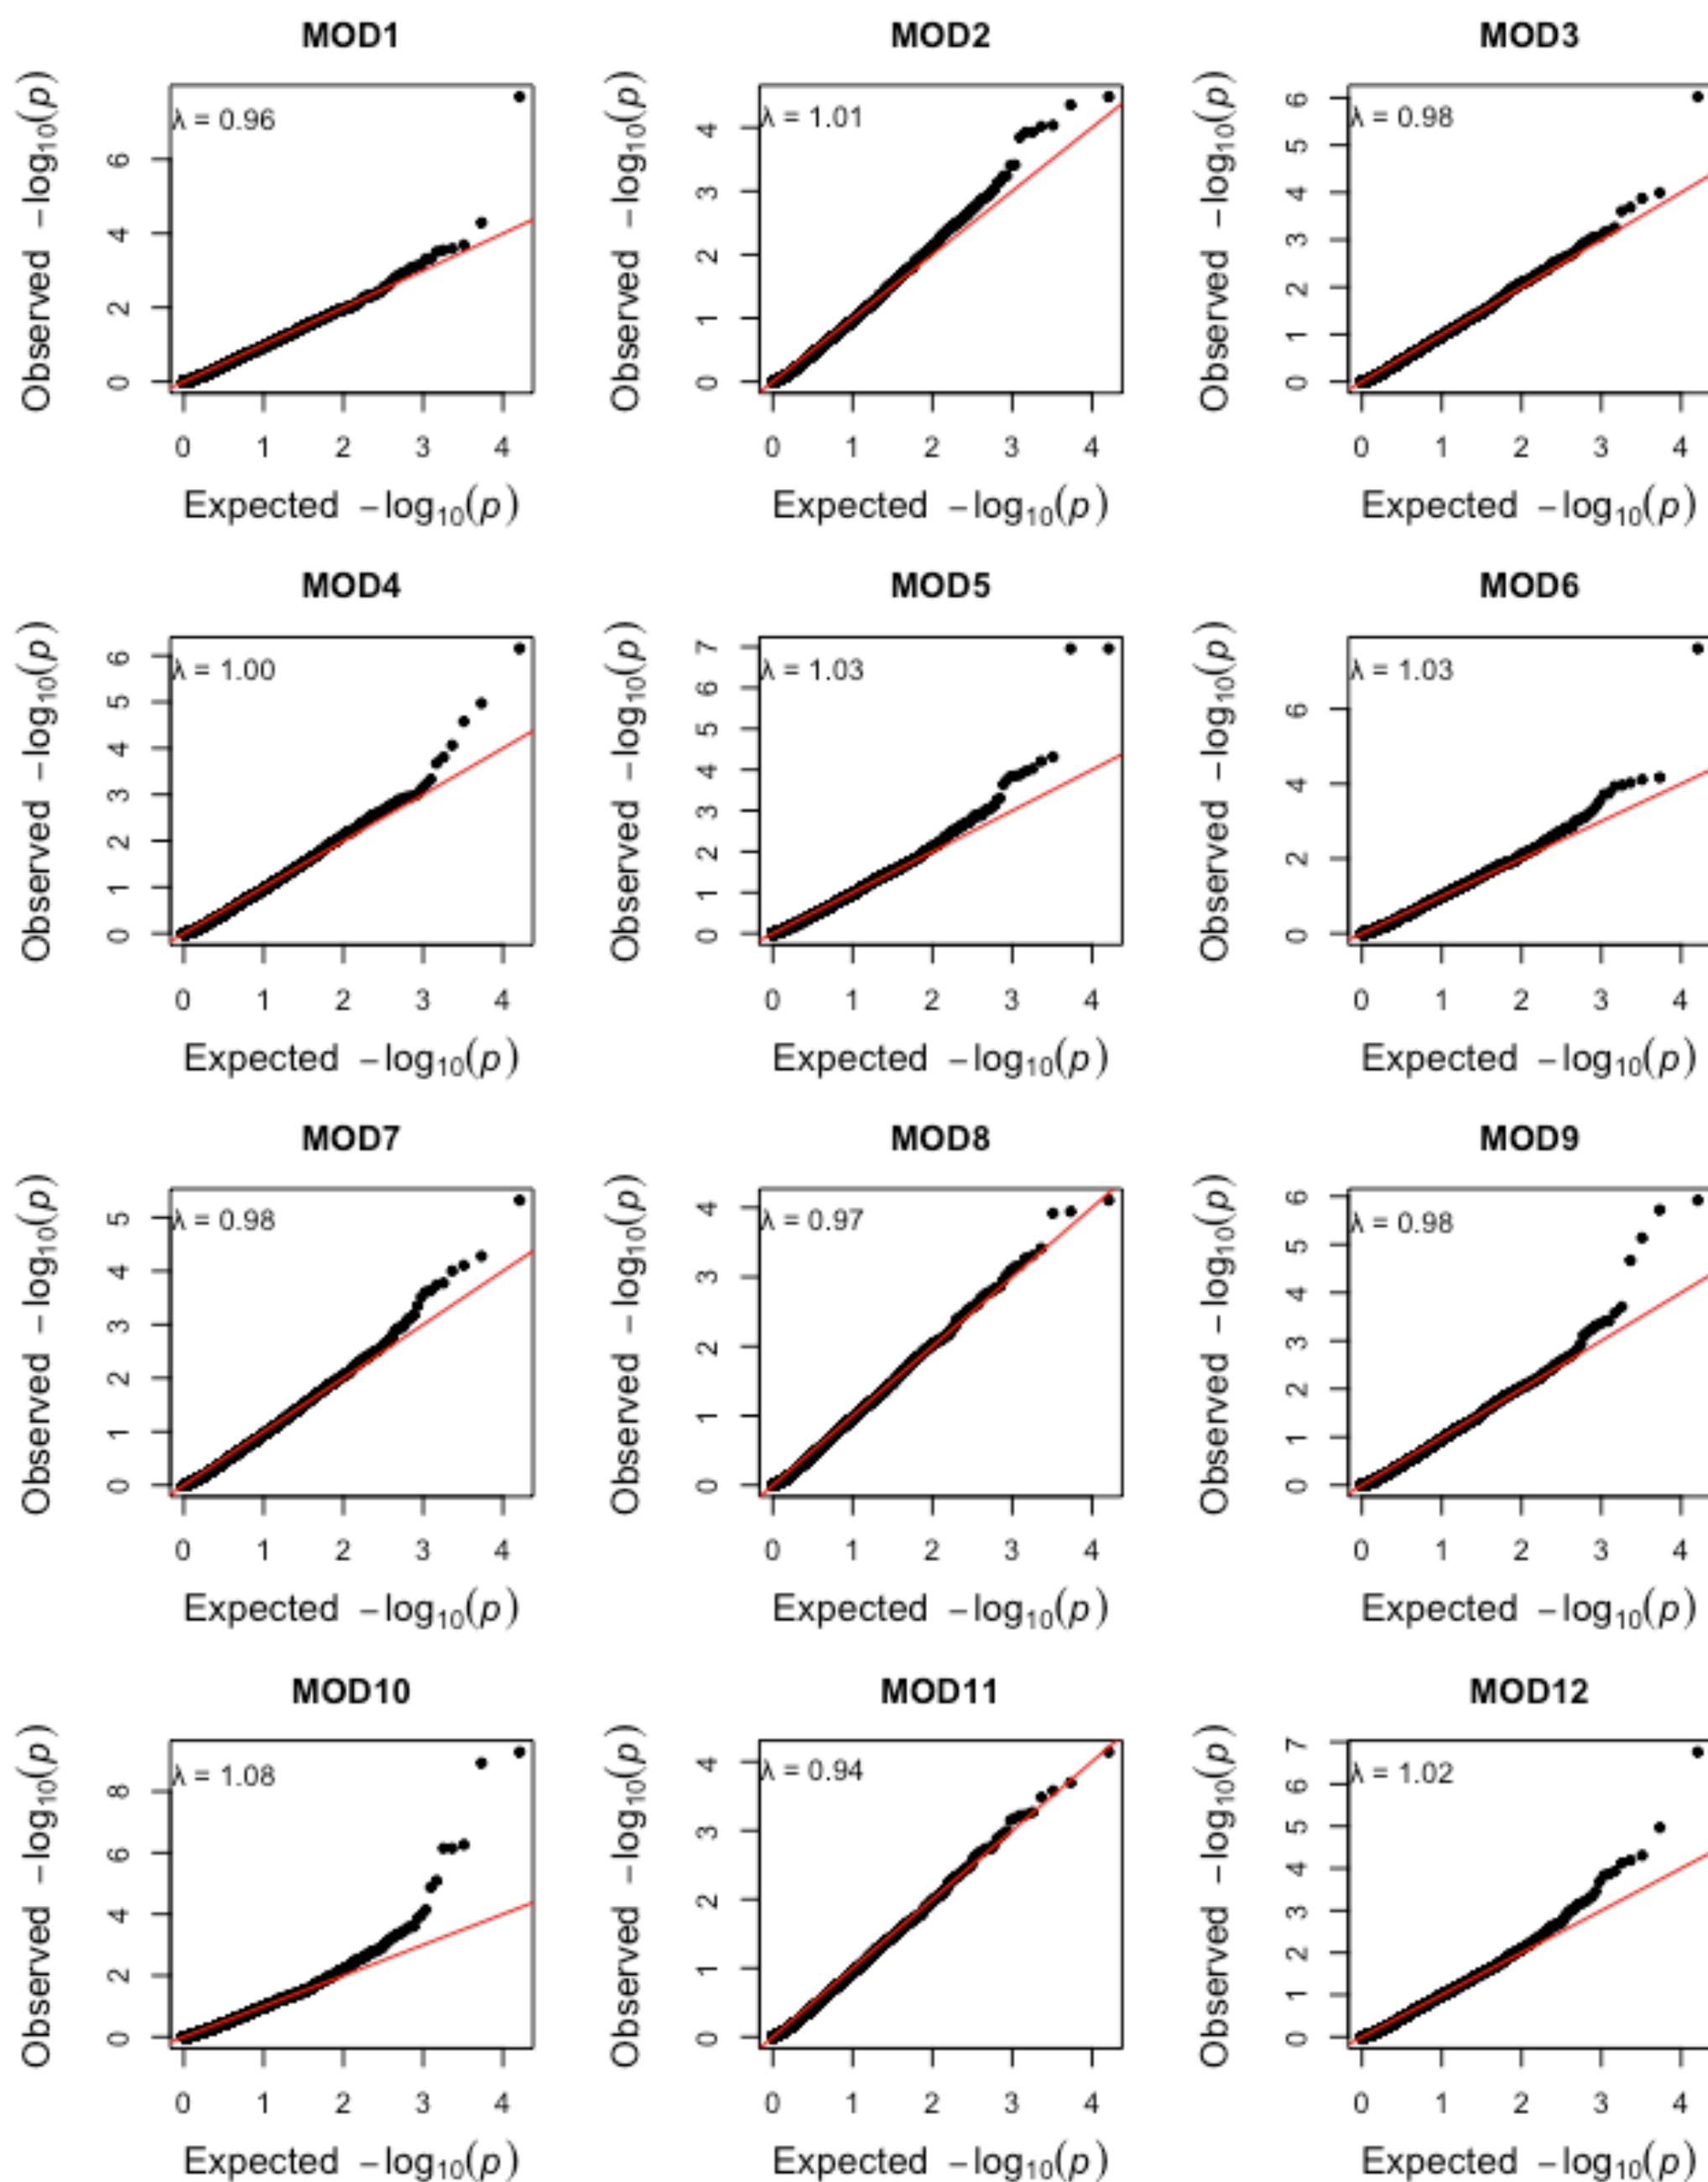

Fig S1. Cont

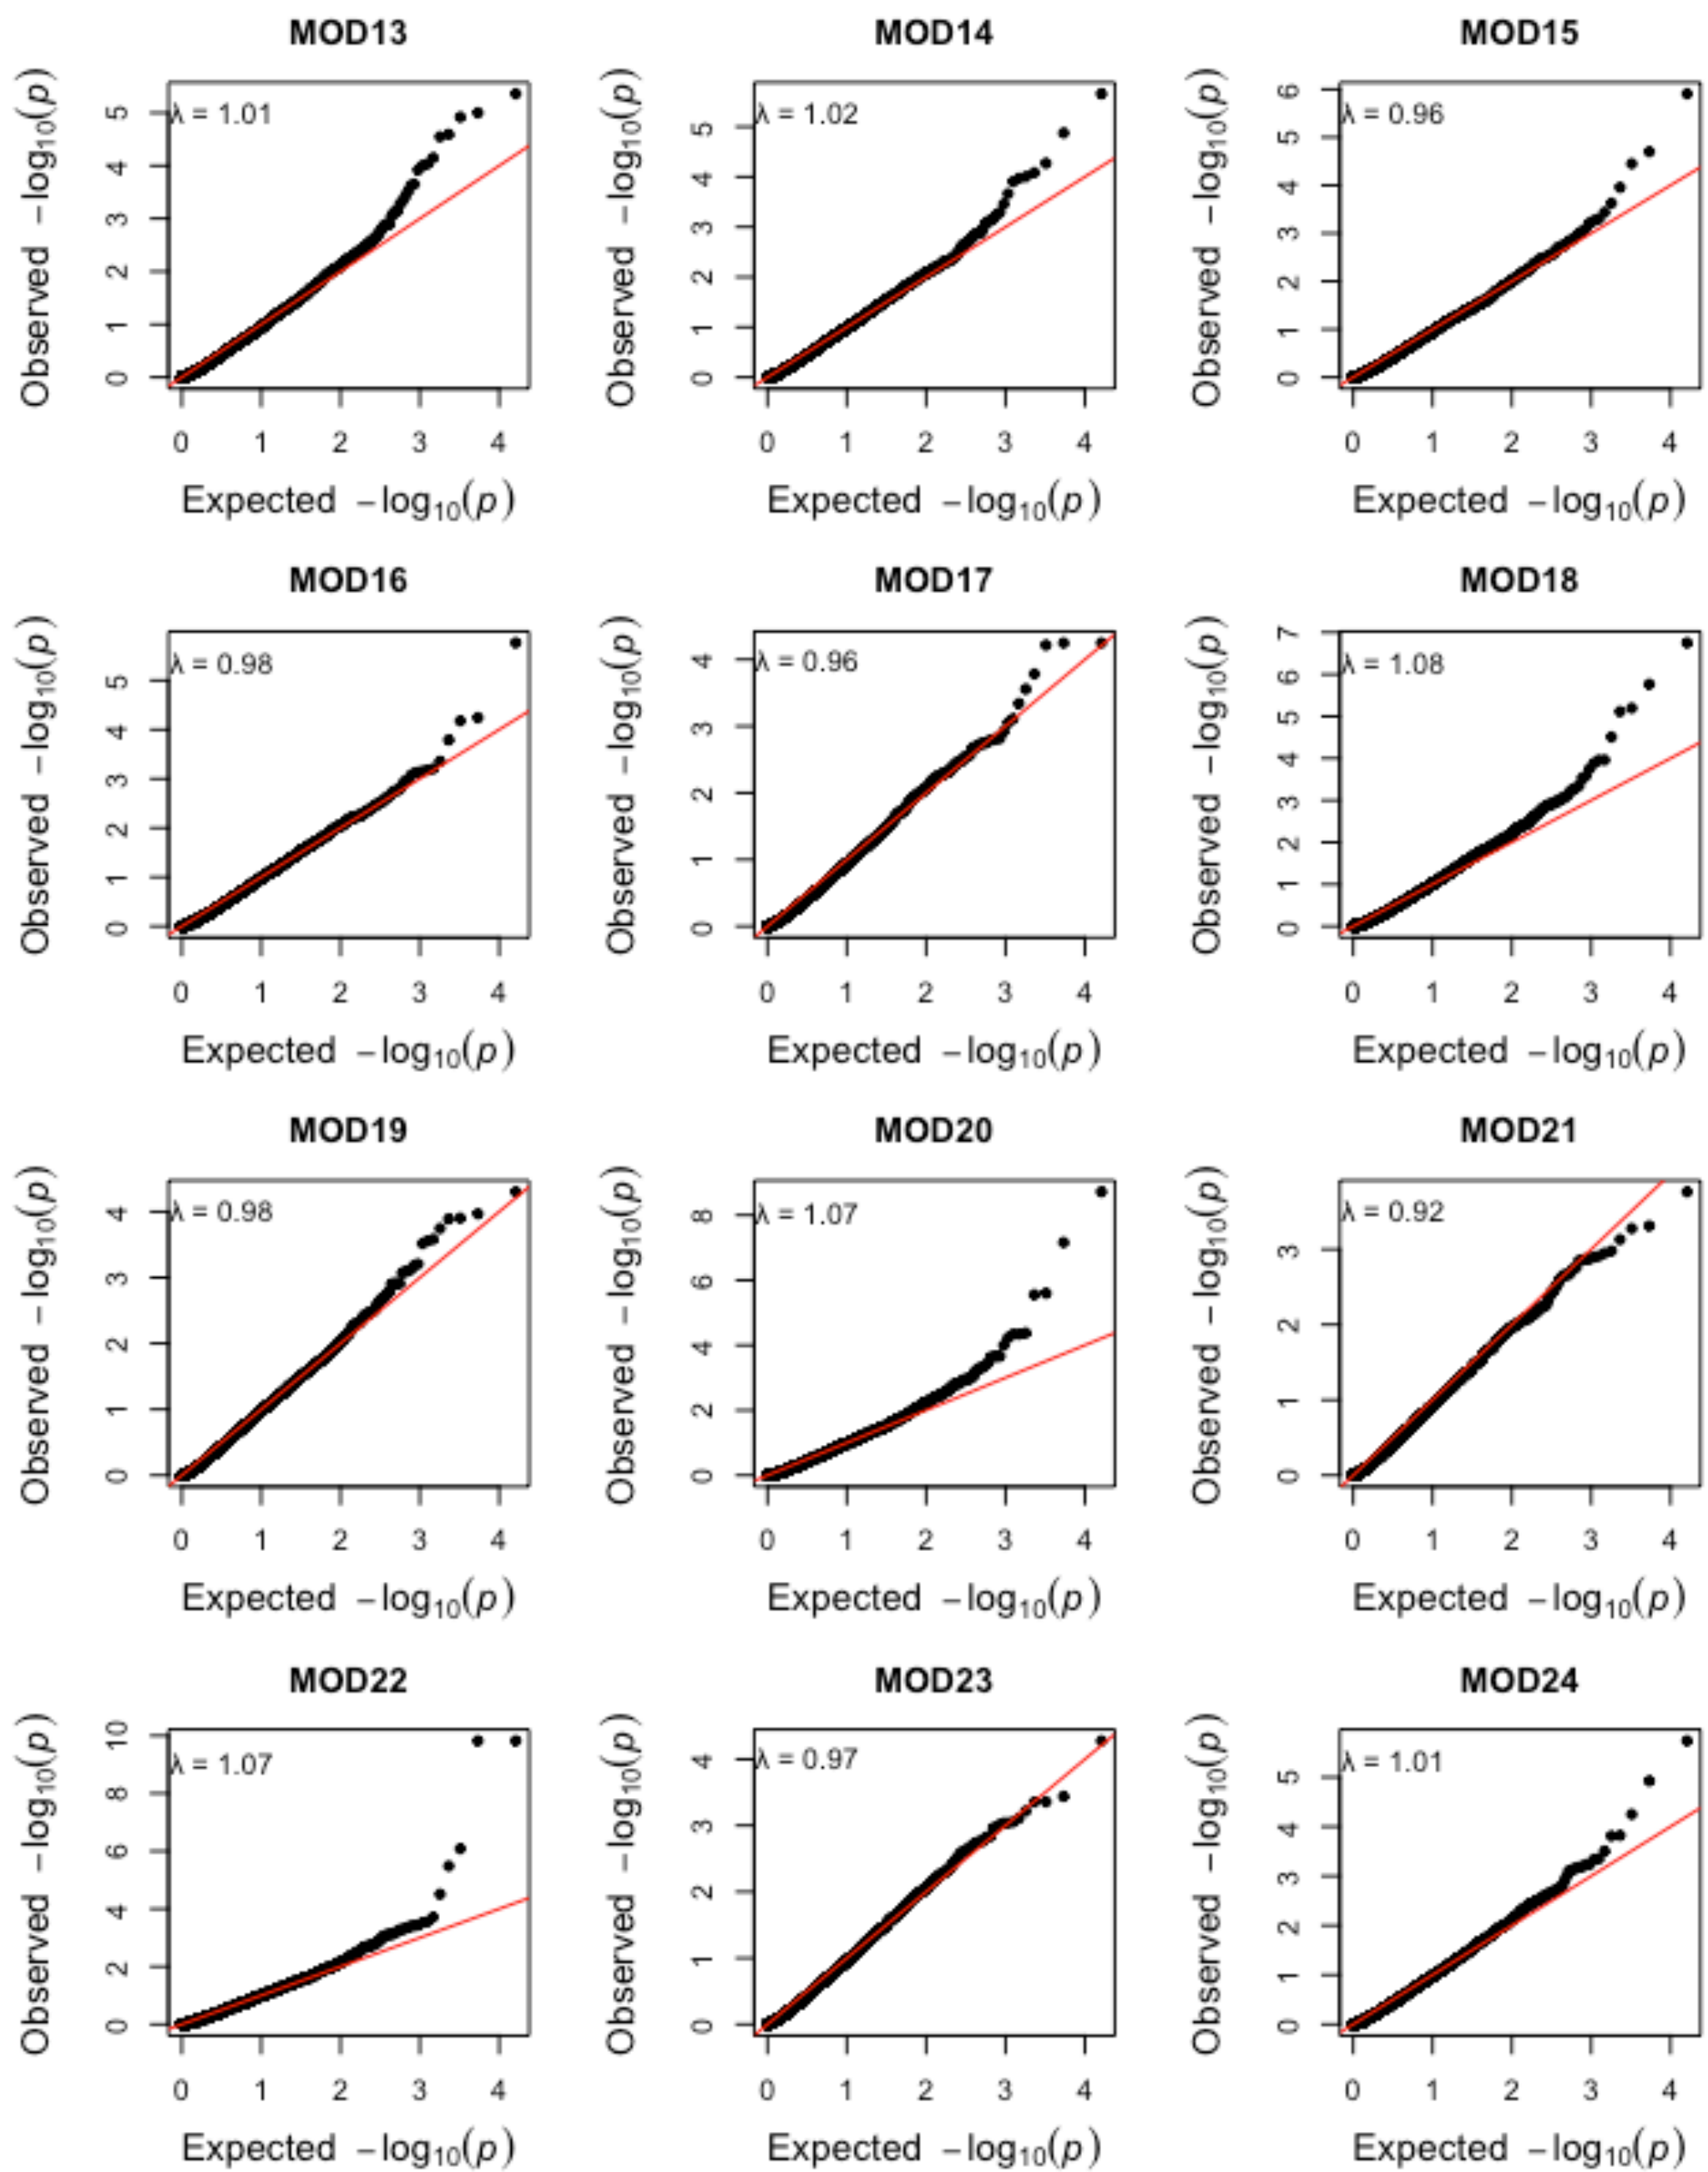

Fig S1. Cont

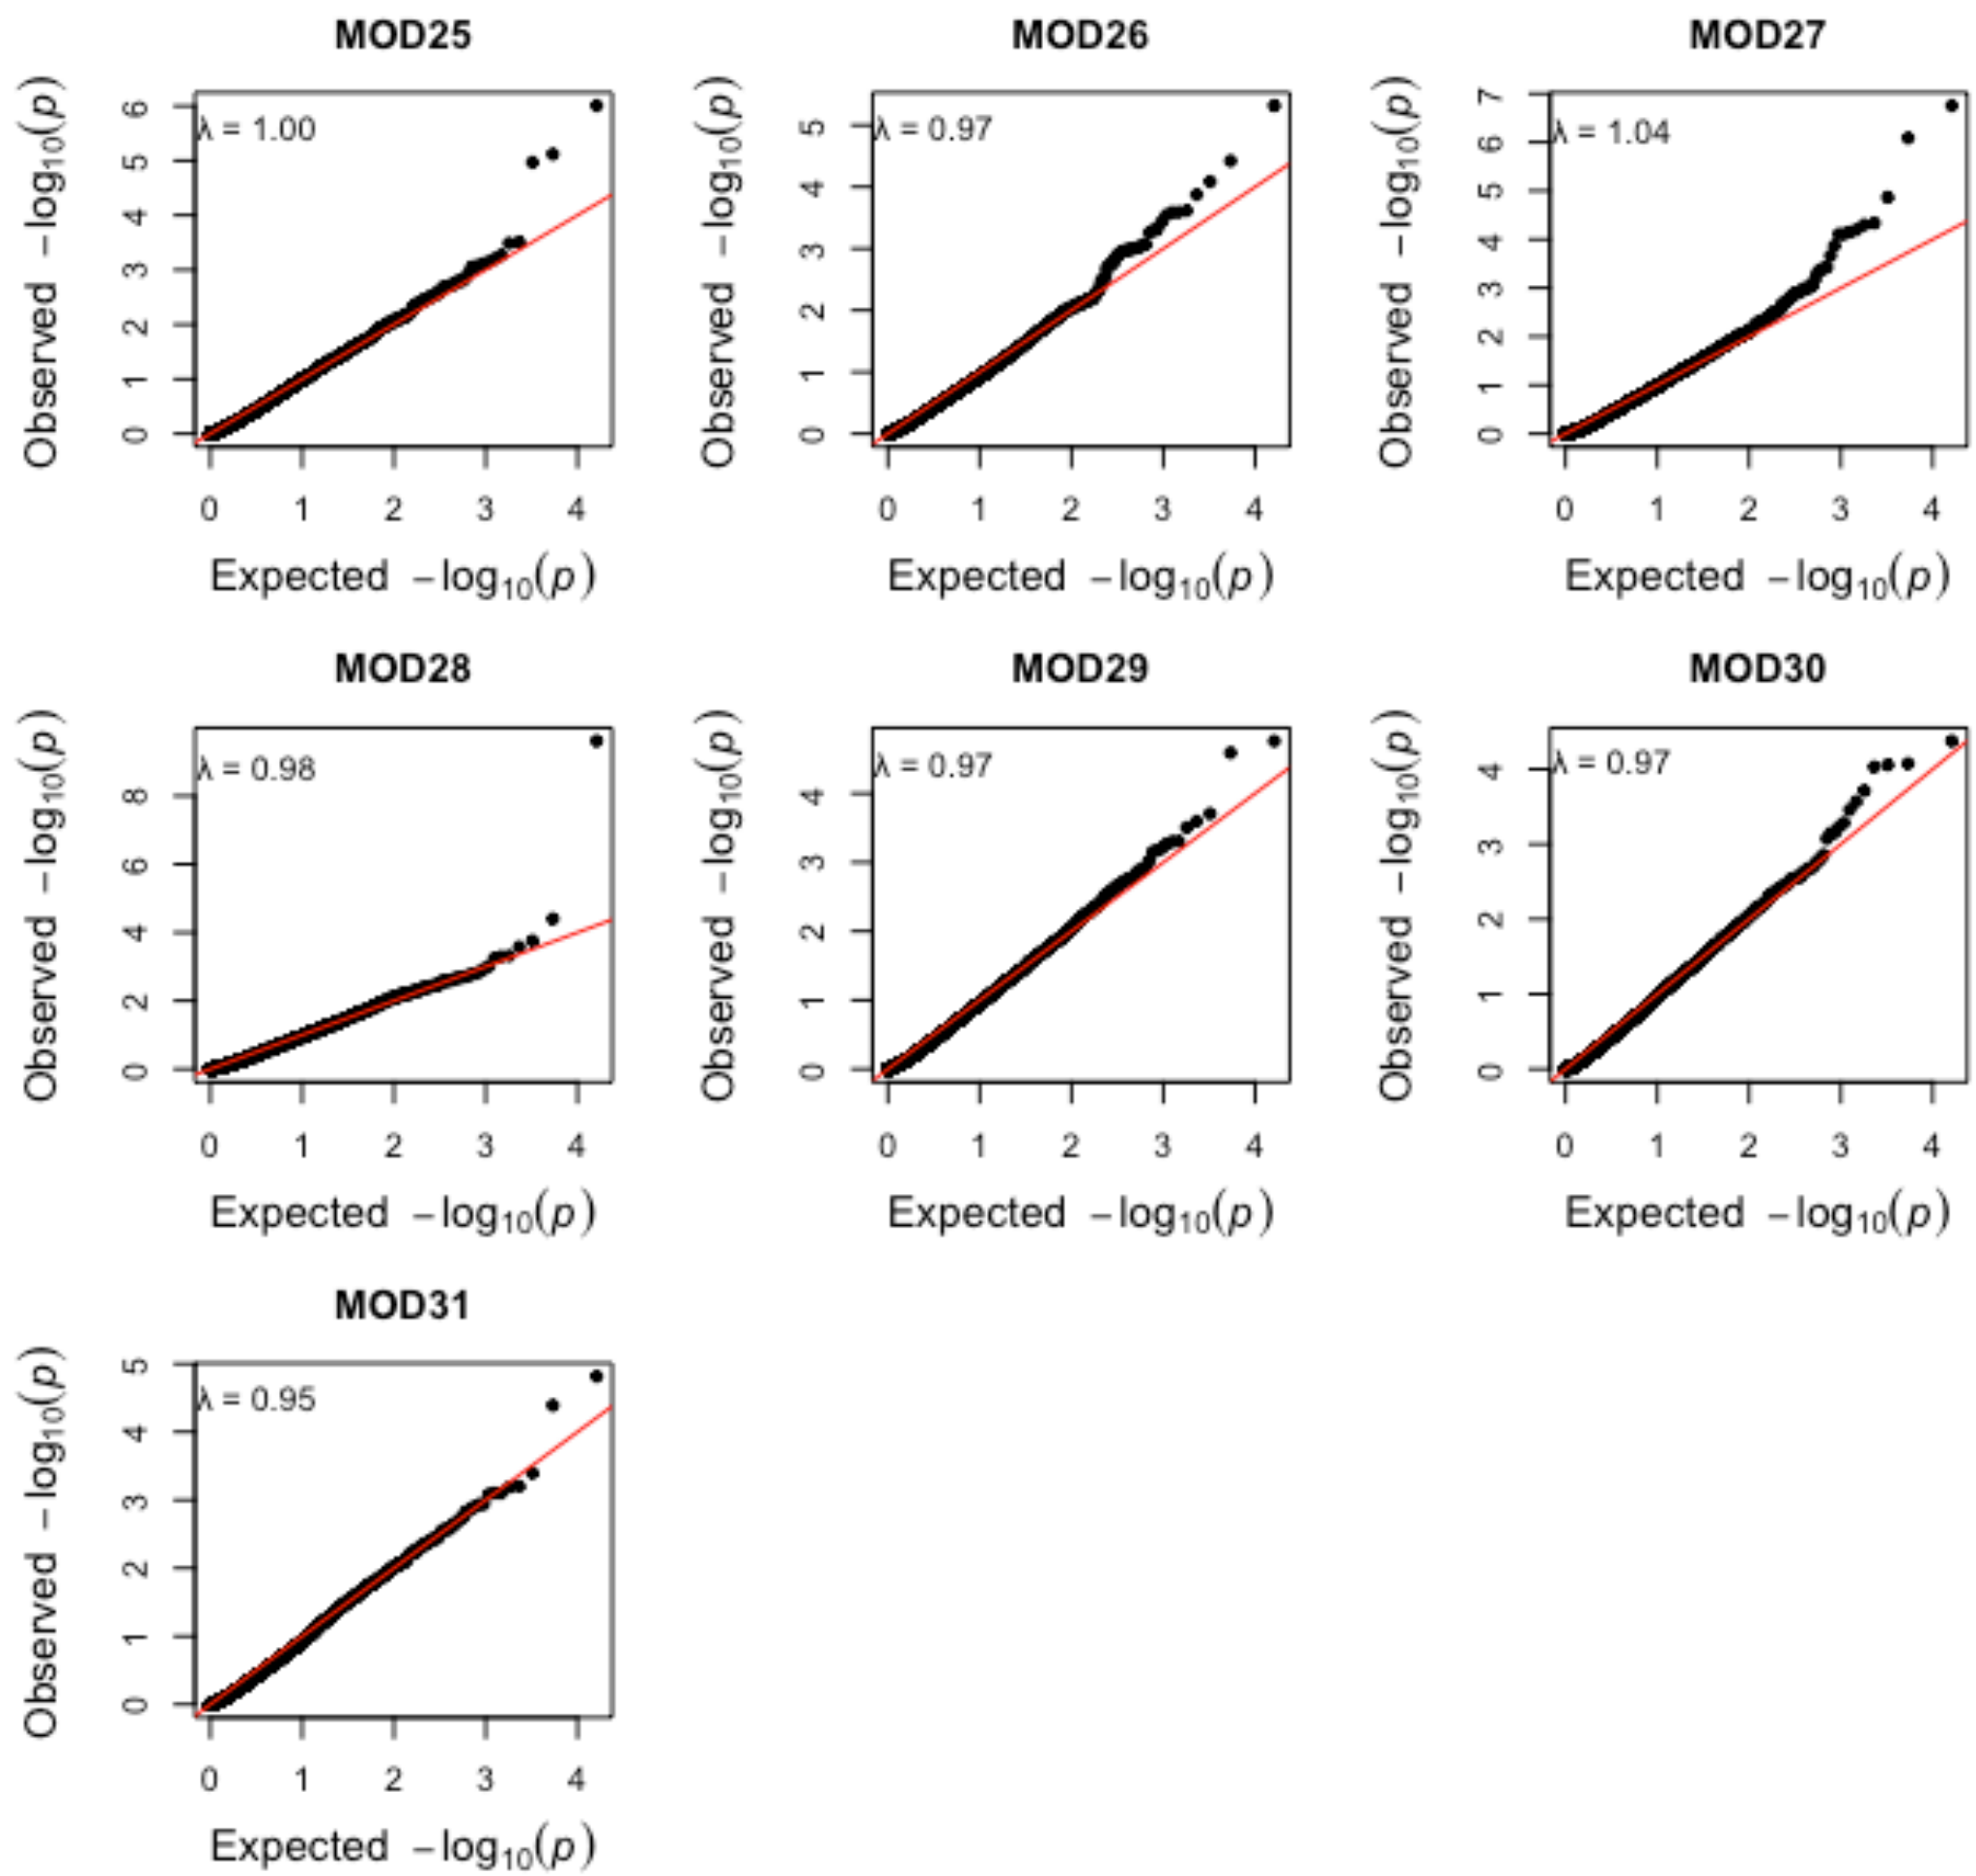

Supplement: Supplementary file [file media-1.pdf]
