# Supplementary material for: Impact of low-frequency coding variants on human facial shape
Source: bioRxiv or medRxiv preprint supplement (doi:10.1101/2020.07.30.227769), 2020-09-05

a) GO biological process

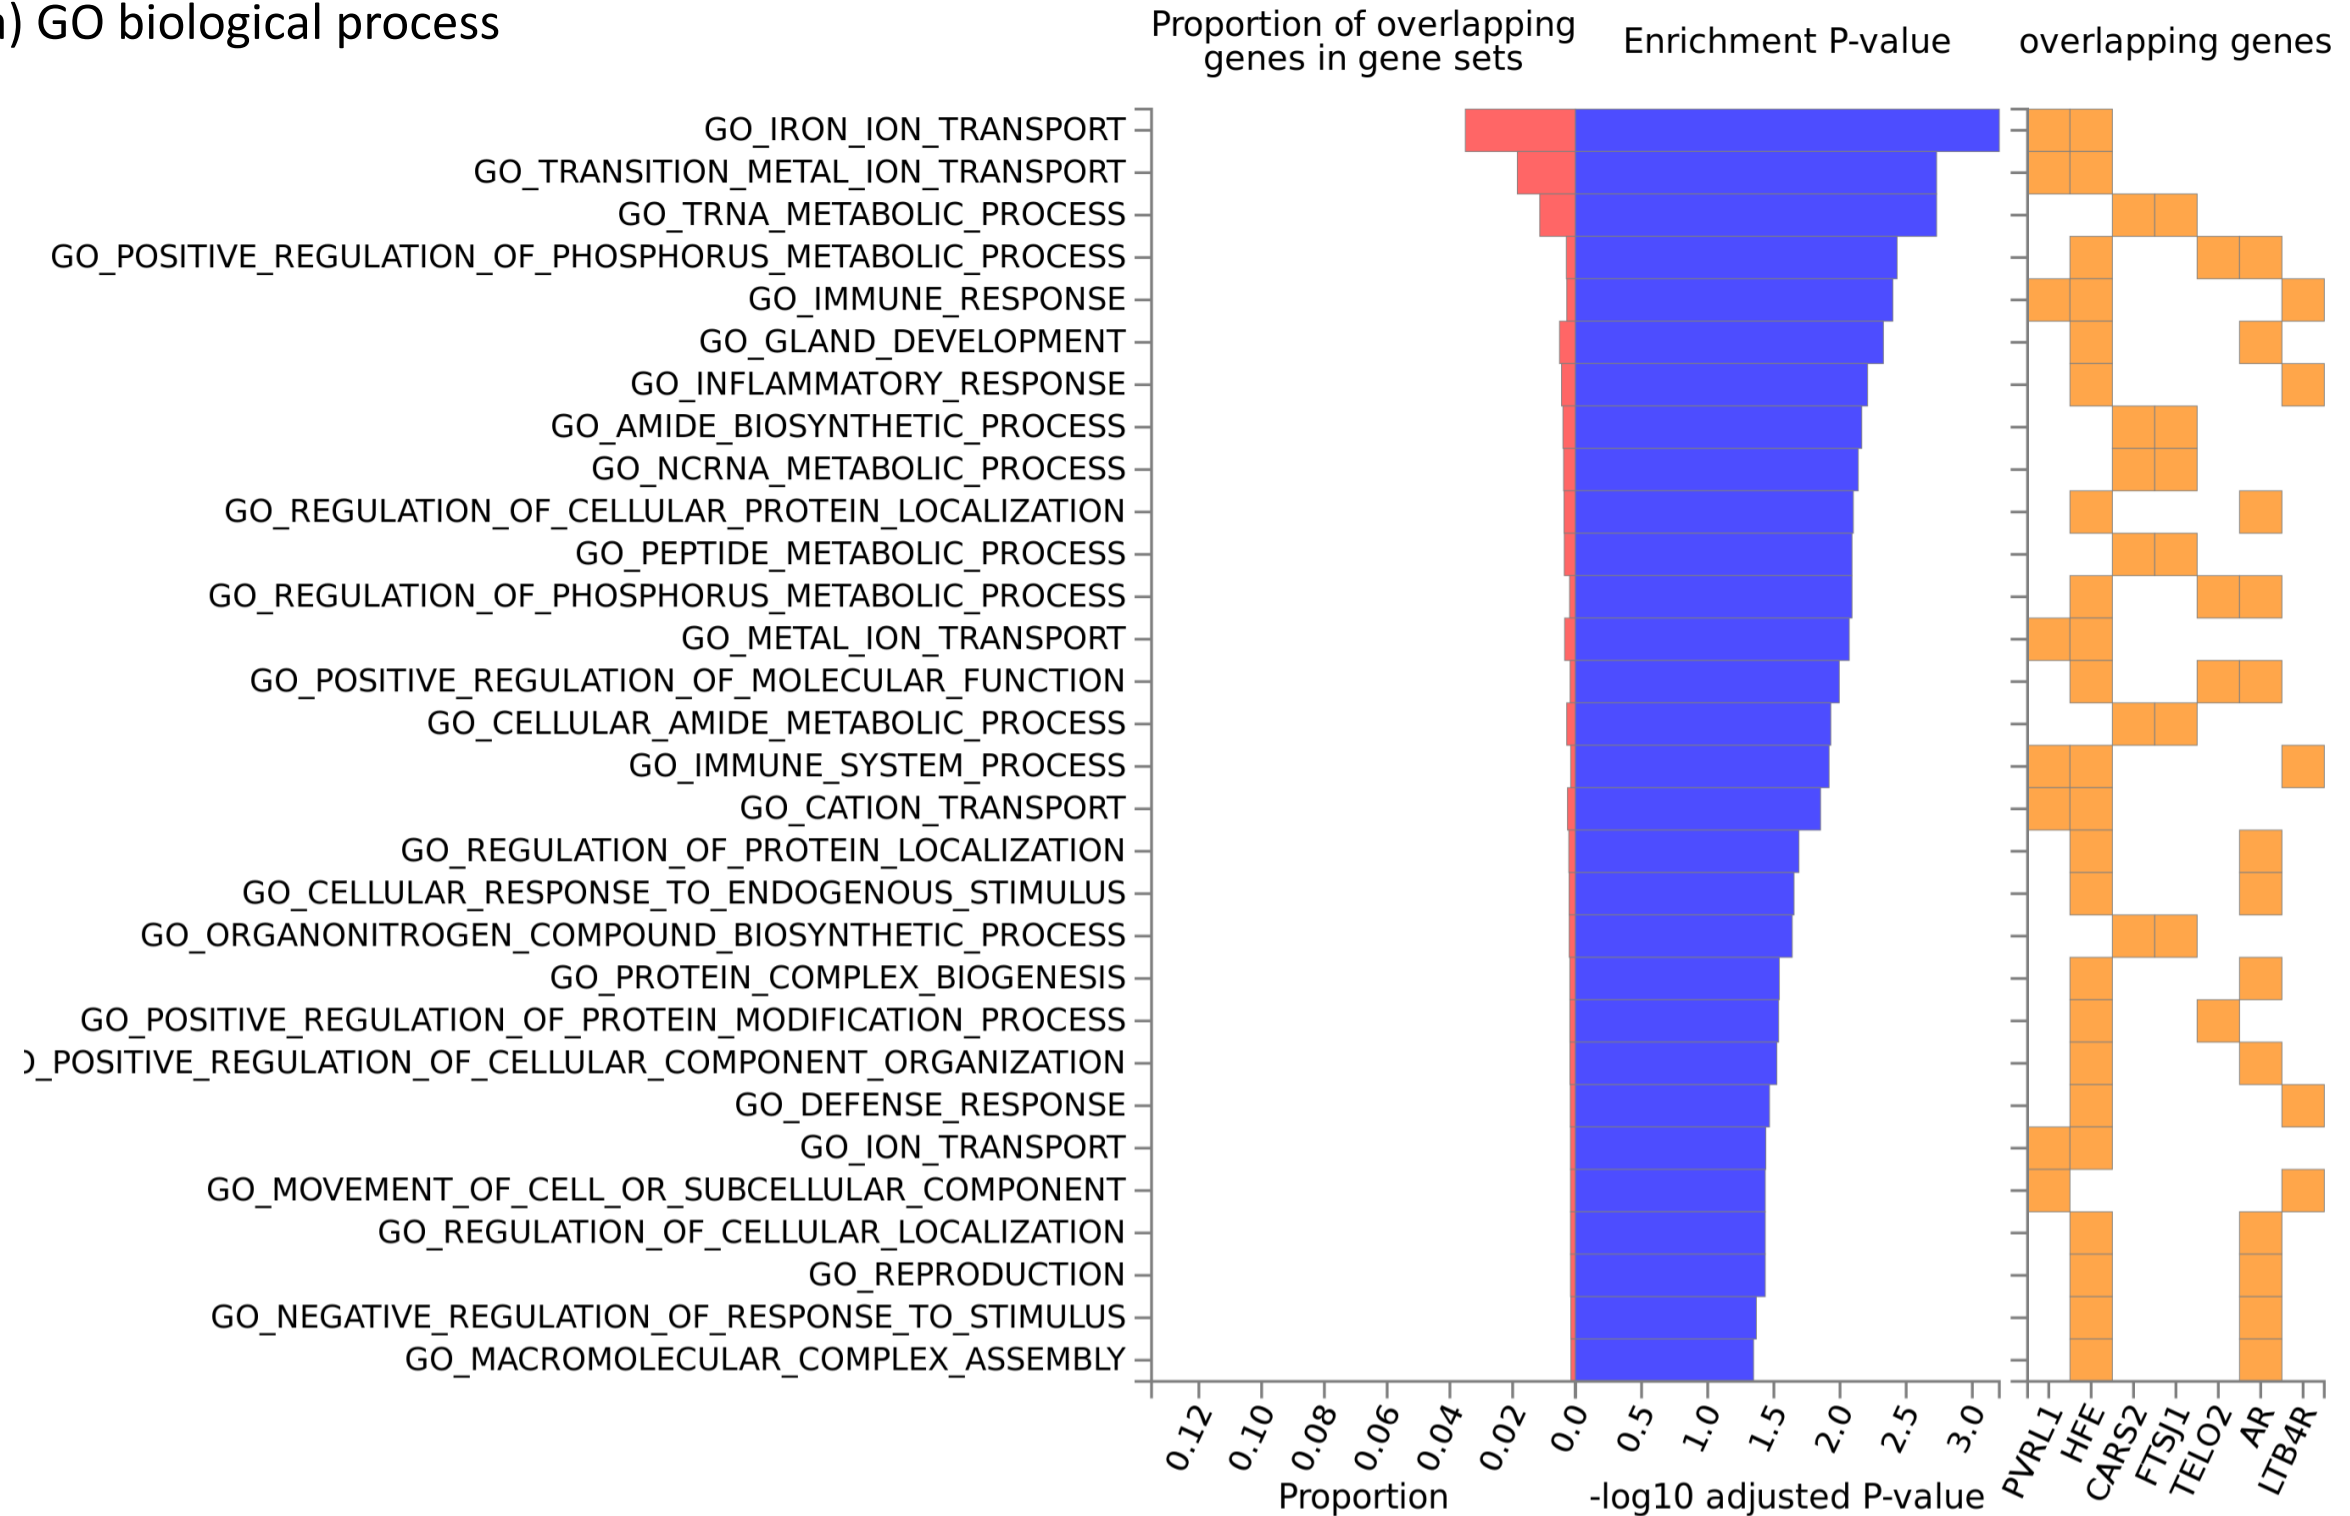

b) GO molecular function

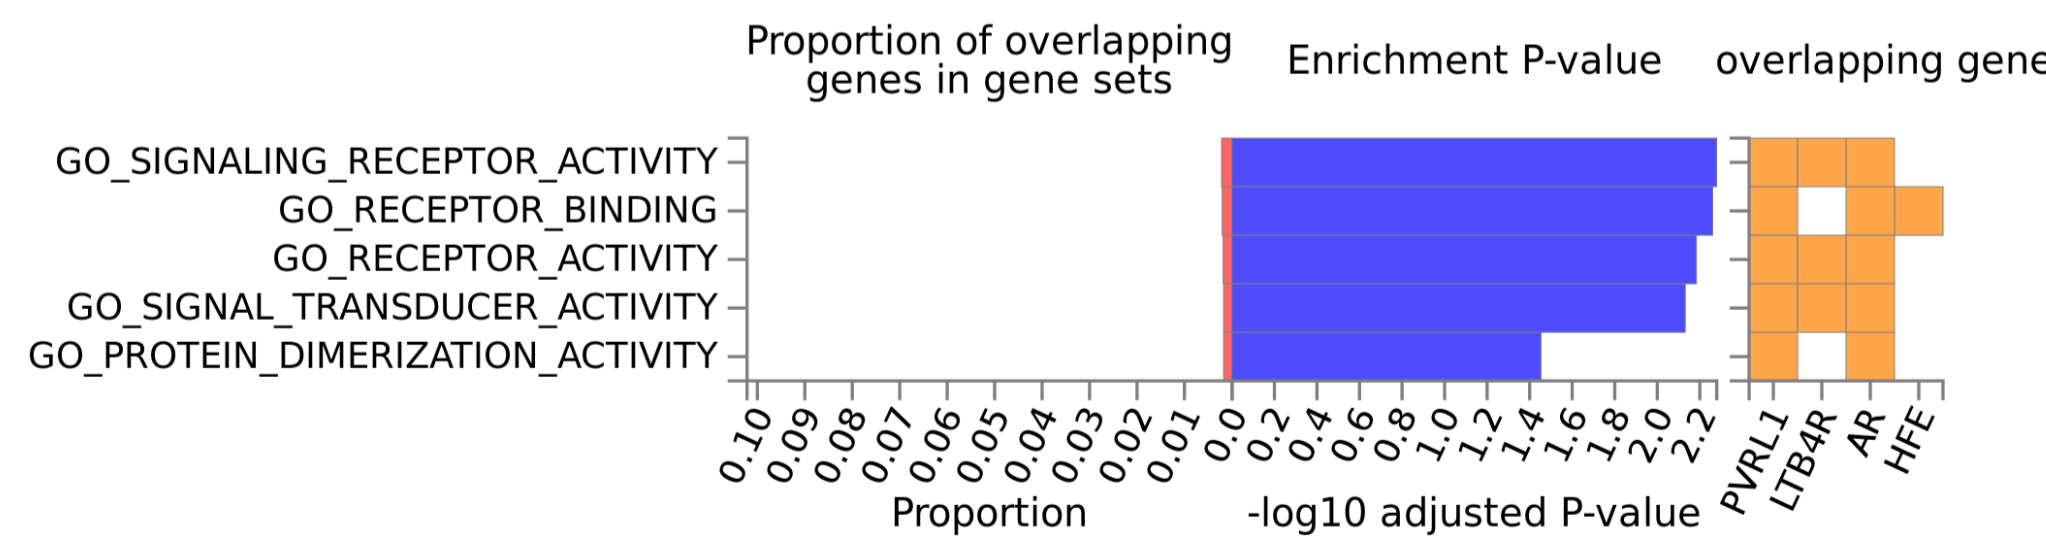

c) GWAS catalog

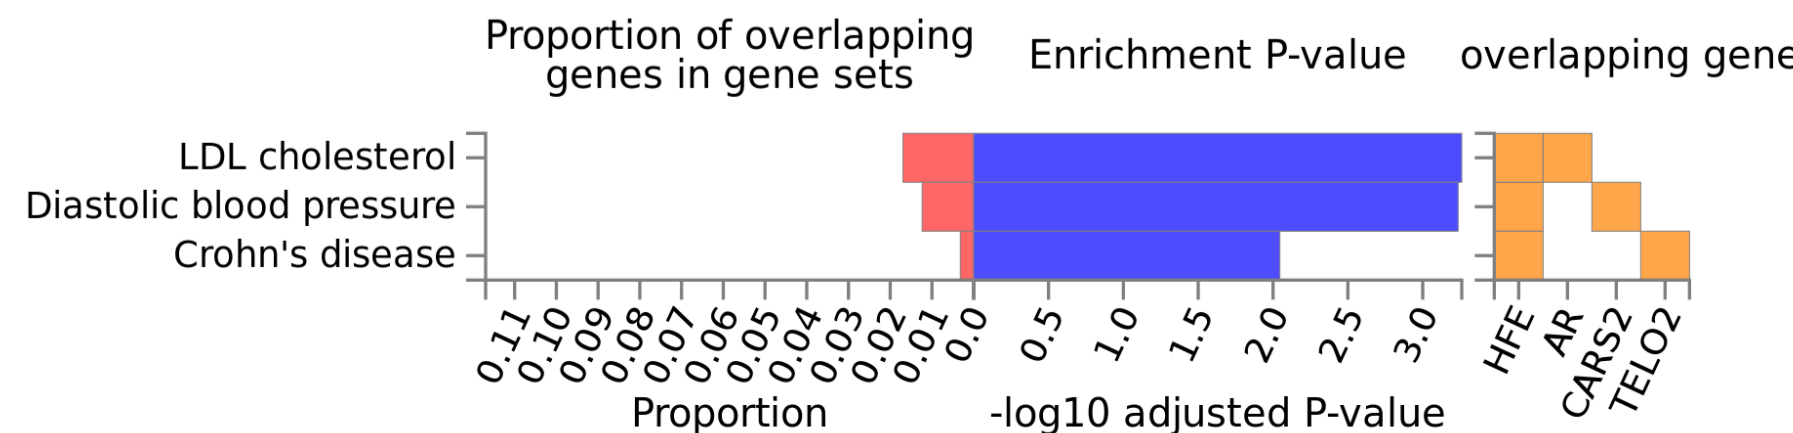

Supplement: Supplementary file [file media-3.pdf]
