# Supplementary material for: Impact of low-frequency coding variants on human facial shape
Source: bioRxiv or medRxiv preprint supplement (doi:10.1101/2020.07.30.227769), 2020-09-05

Fig S3. GTEx expression of MultiSKAT significant genes in tissues relevant to facial morphology. Dendrogram denotes similarity in expression level. TPM, transcripts per million.

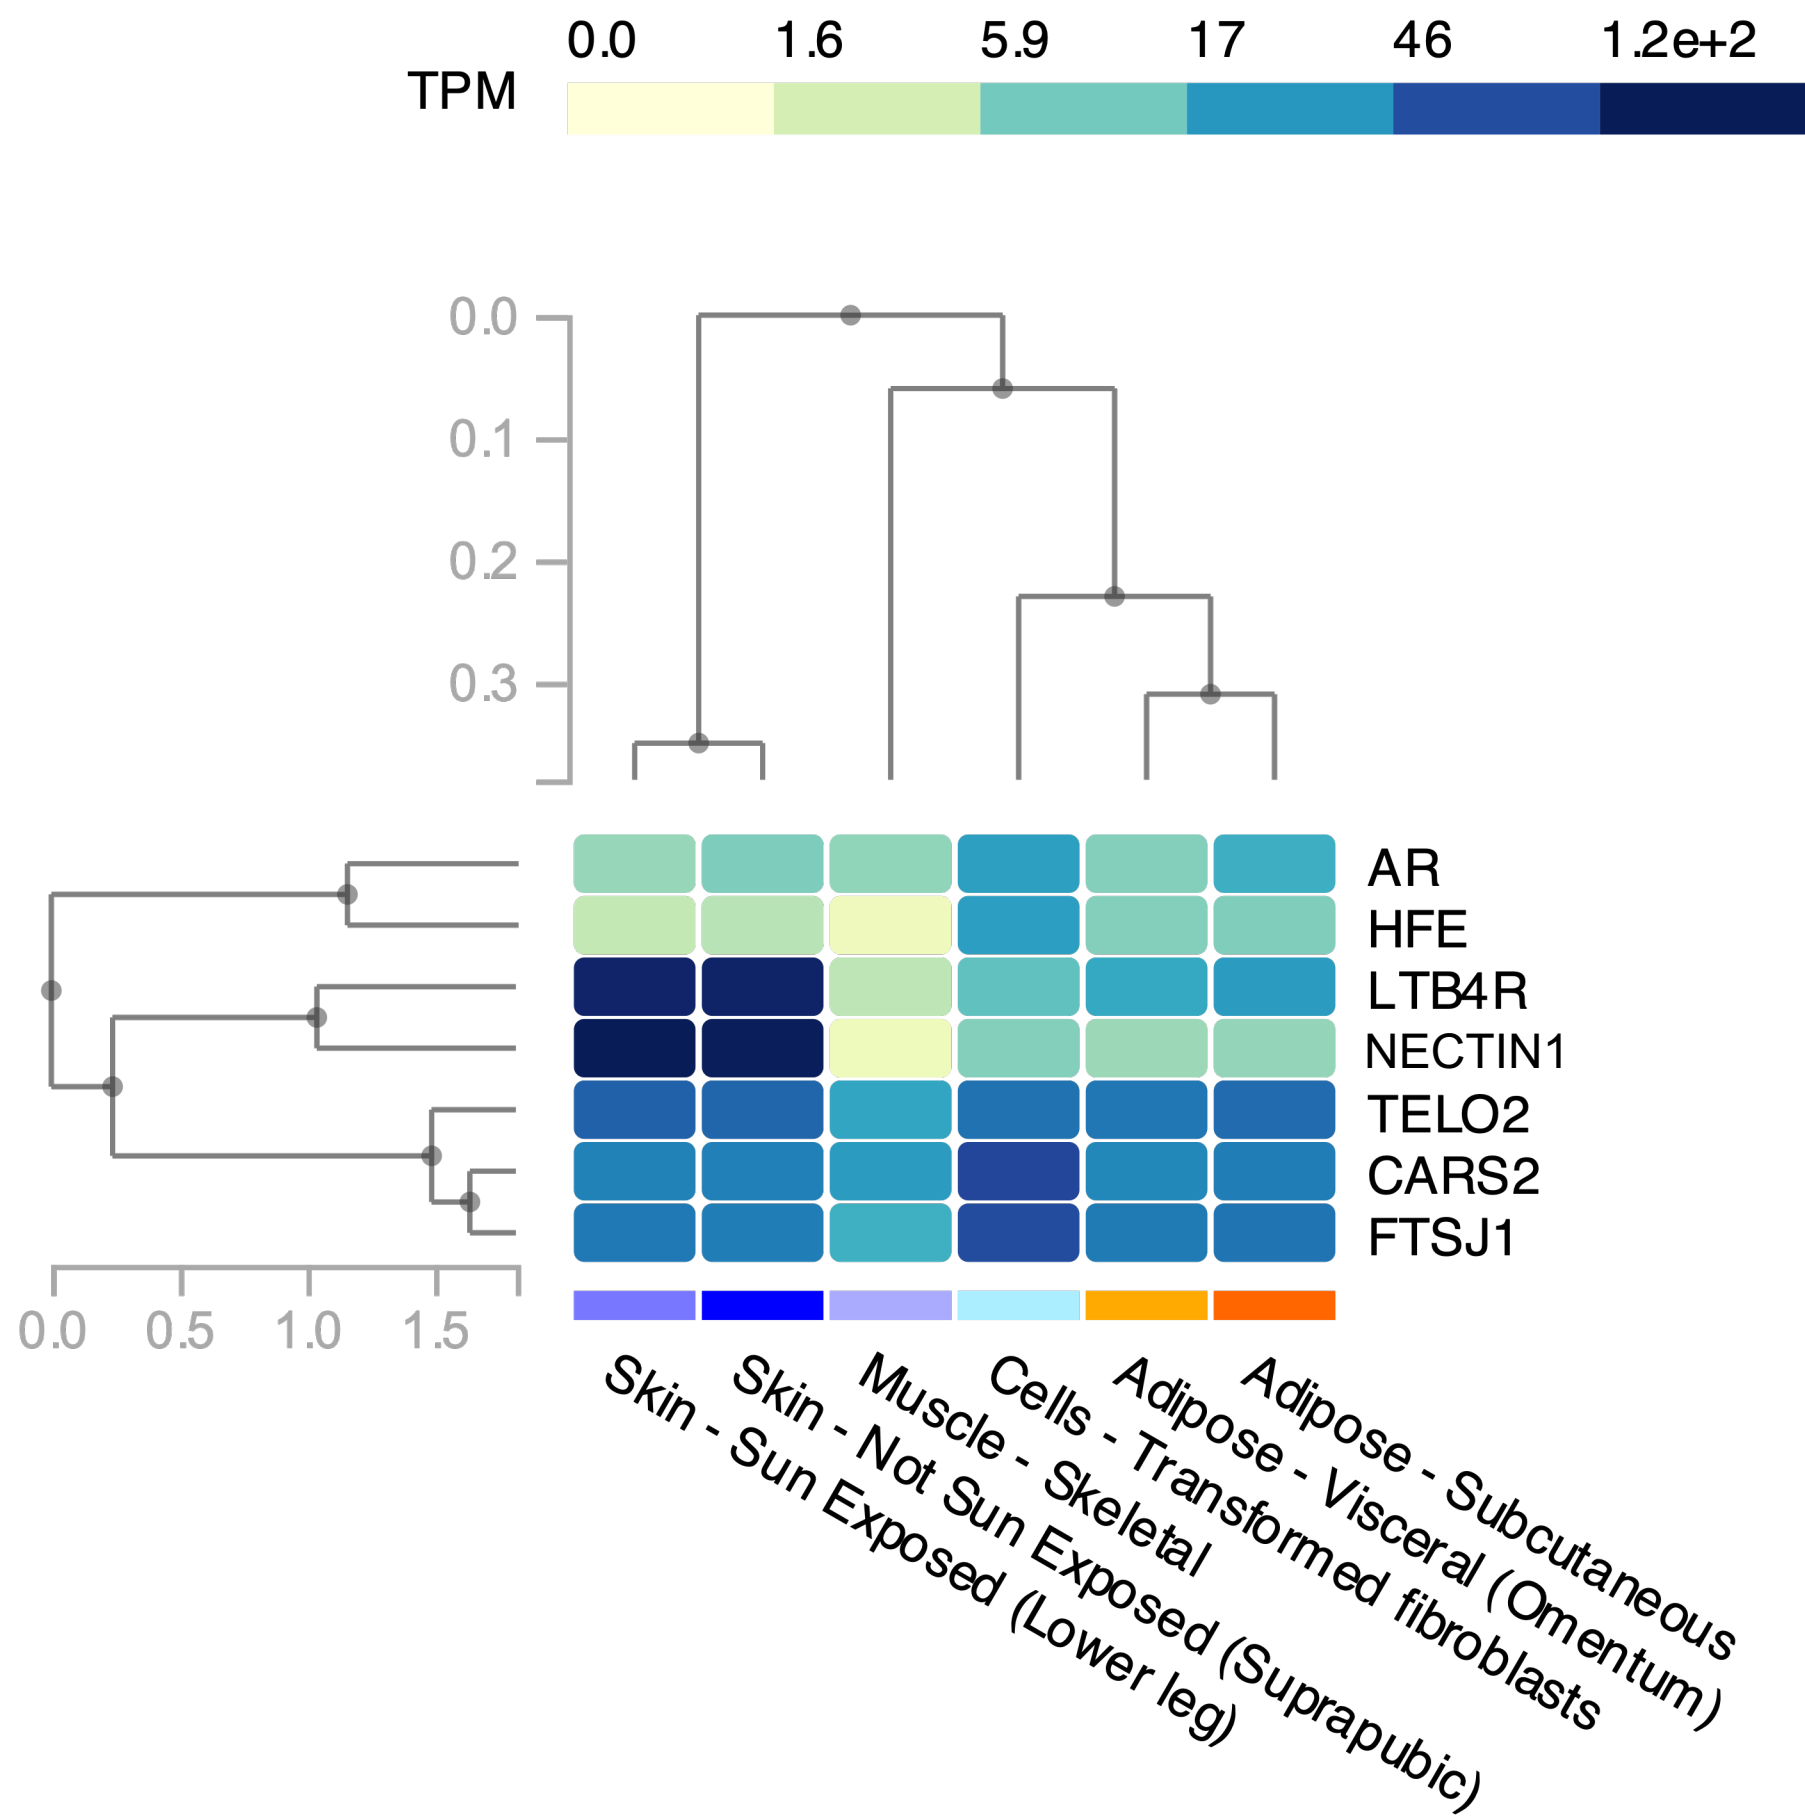

Supplement: Supplementary file [file media-5.pdf]
