# Supplementary material for: Impact of low-frequency coding variants on human facial shape
Source: bioRxiv or medRxiv preprint supplement (doi:10.1101/2020.07.30.227769), 2020-09-05
Supplement: Supplementary file [file media-7.pdf]

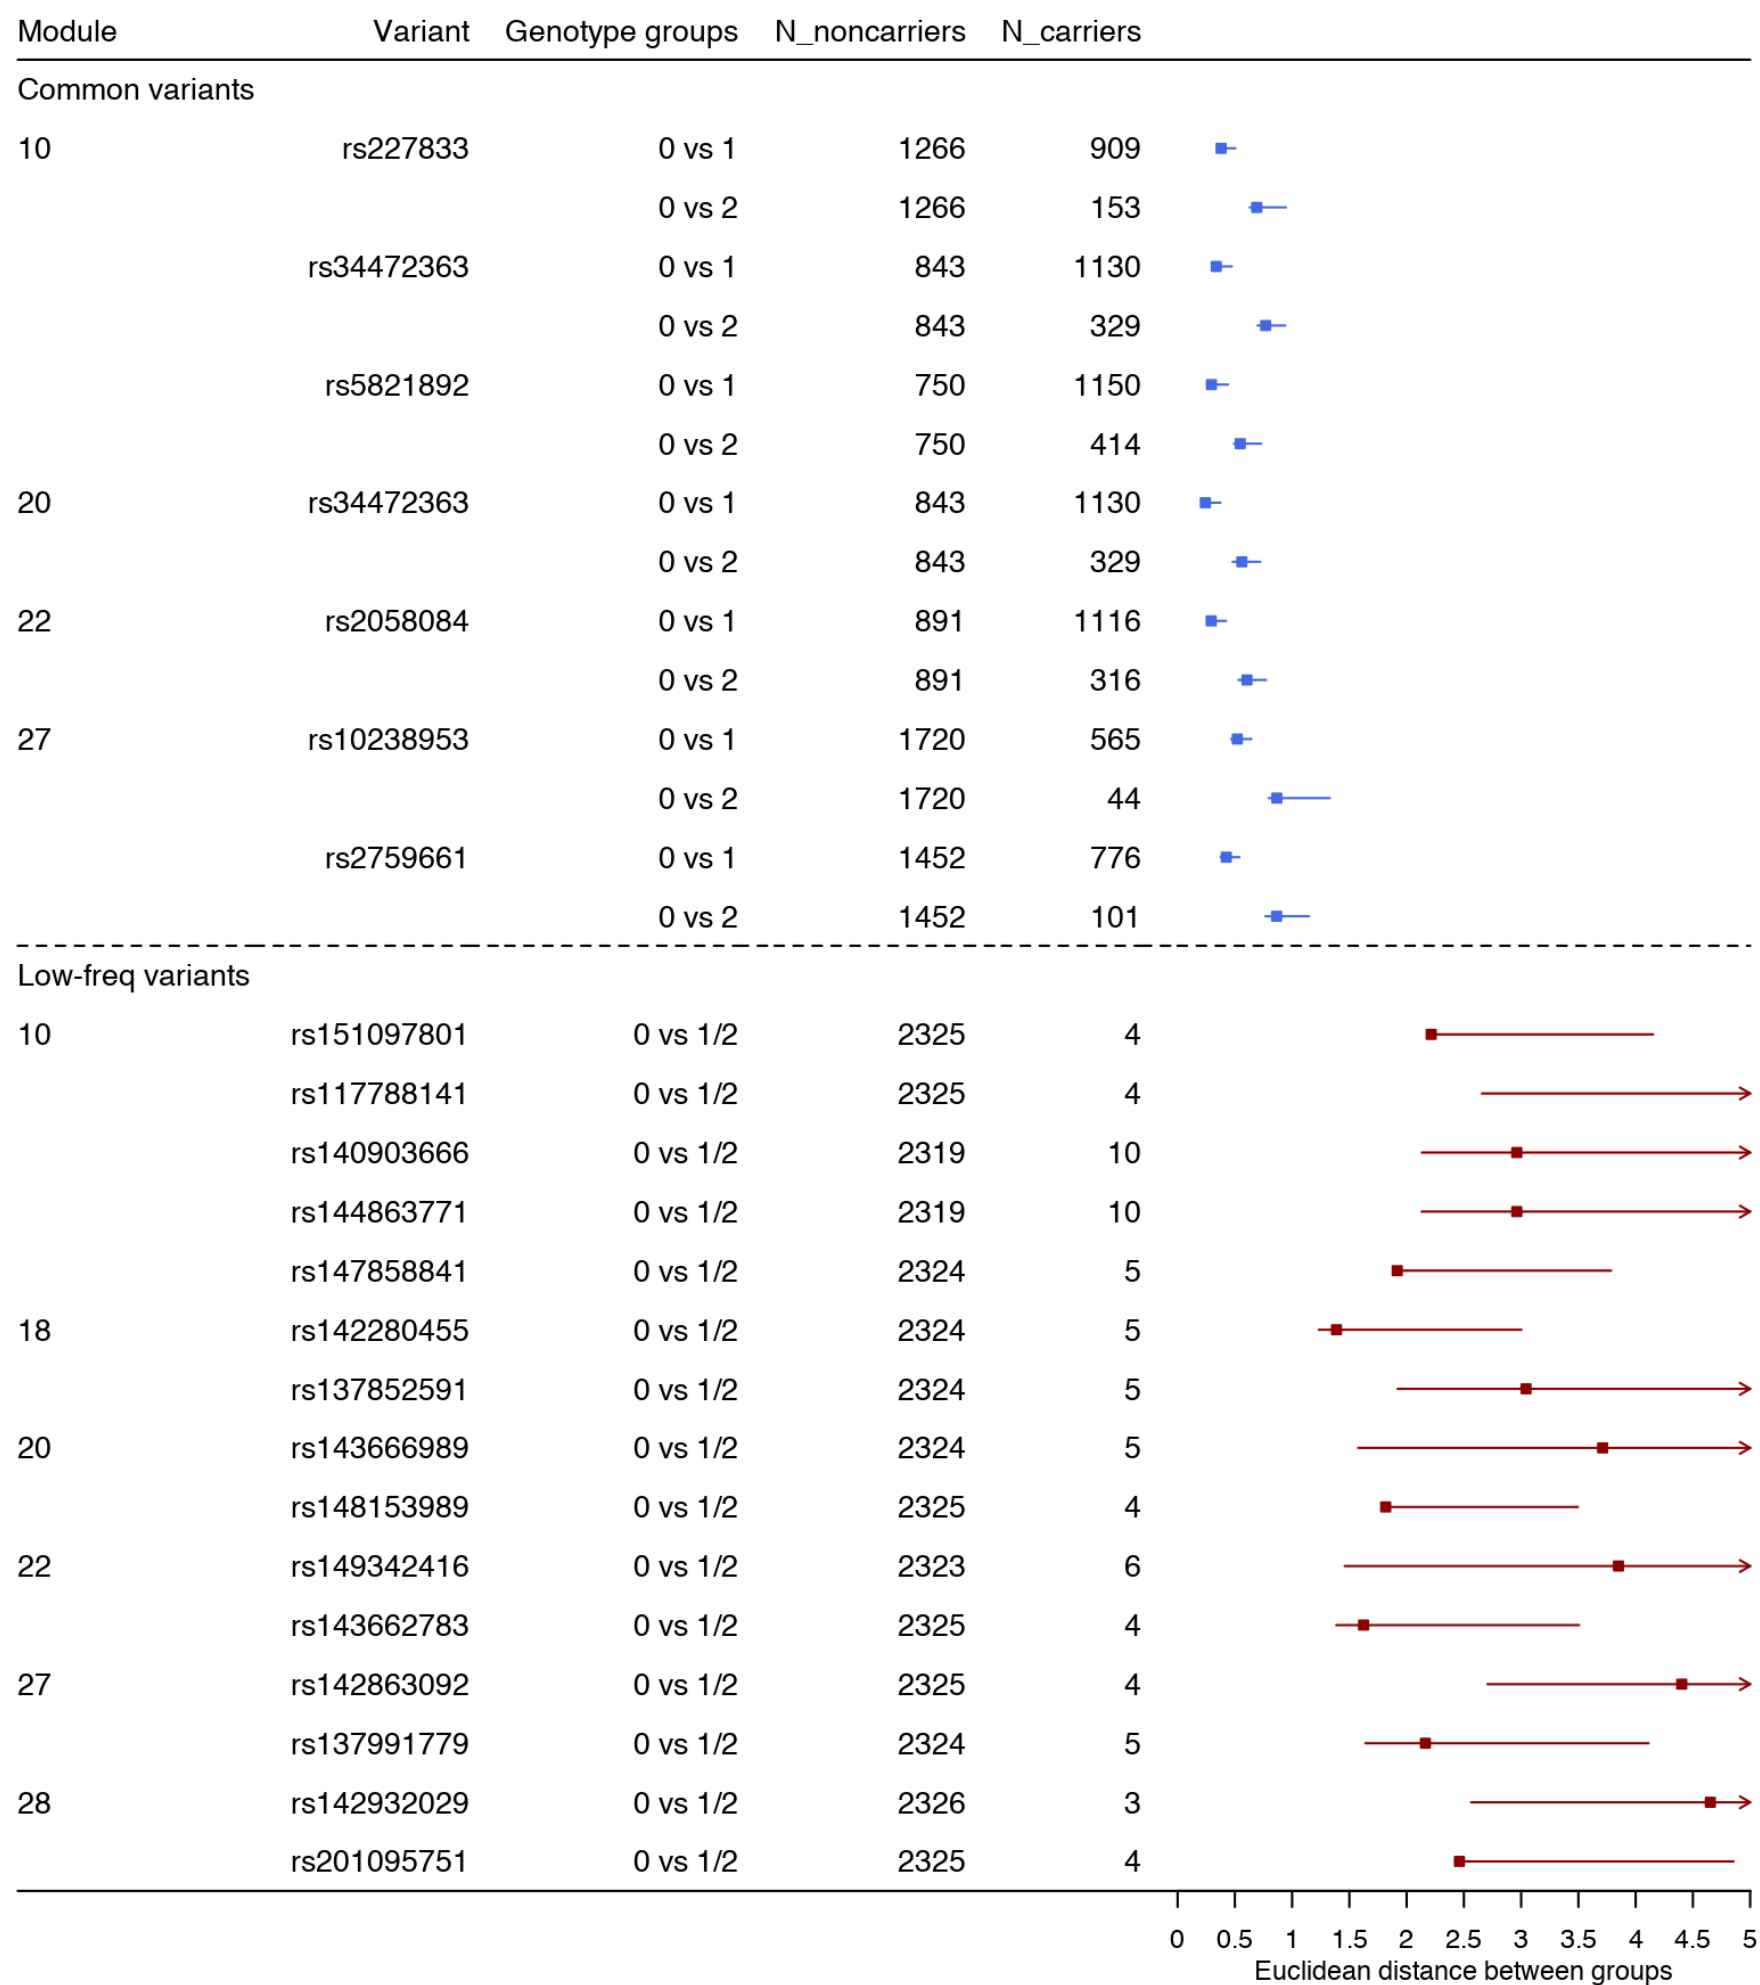

Fig S4. Magnitude of variant effect on facial modules, quantified by the Euclidean distance between averaged faces of different genotype groups. The 95% confidence interval was obtained by 5000 bootstraps. The farther away the blue (common) or red (low-freq) rectangular boxes fall from line  $x=0$ , the larger the group distances and the greater the magnitude of effects. Common variants that yielded significant GWAS association in the same cohort with the same modules are used as a comparison to low-frequency variants. Genotype groups column indicates the two groups of people of whom the faces were averaged and distance was computed. For example, 0 vs 1/2 means minor allele homozygotes vs the remaining. The following two columns indicate sizes of the two groups in comparison. Low-frequency variants had large effects compared to previously reported common variants, although this could be a result from the much smaller size of carrier group and may not reflect genuine greater effects of low-frequency variants.
